# Supplementary material for: Molecular Evolution of CatSper in Mammals and Function of Sperm Hyperactivation in Gray Short-Tailed Opossum
Source: Cells. 2021 Apr 29;10(5):1047. doi: 10.3390/cells10051047 (PMC8147001; doi:10.3390/cells10051047)
Supplement: Supplementary file 1 [file cells-10-01047-s001.zip]

Archive with 9 entries (9 files):
- Hwang_et_al_2021_Cells_Evo_Supplementary_Movie_1.mp4
- Hwang_et_al_2021_Cells_Evo_Supplementary_Movie_2.mp4
- Hwang_et_al_2021_Cells_Evo_Supplementary_Movie_3.mp4
- Hwang_et_al_2021_Cells_Evo_Supplementary_Movie_4.mp4
- Hwang_et_al_2021_Cells_Evo_Supplementary_Movie_5.mp4
- Hwang_et_al_2021_Cells_Evo_Supplementary_Movie_6.mp4
- Hwang_et_al_2021_Cells_Supplementary_Figures.pdf
- Hwang_et_al_2021_Evo_Table_S1.xlsx
- Hwang_et_al_2021_Evo_Table_S2.xlsx
