# Supplementary material for: Molecular Evolution of CatSper in Mammals and Function of Sperm Hyperactivation in Gray Short-Tailed Opossum
Source: Cells. 2021 Apr 29;10(5):1047. doi: 10.3390/cells10051047 (PMC8147001; doi:10.3390/cells10051047)
Supplement: Supplementary file 1 [file cells-10-01047-s001.zip › Hwang_et_al_2021_Evo_Table_S1.xlsx]

## Sheet: Accession Nos.
Supplementary Table 1. Species and CatSper ortholog information for sequence analyses
Clade	Organism	CatSper1	CatSper2	CatSper3	CatSper4	CatSperb	CatSperg	CatSperd	CatSpere	CatSperz	EFCAB9
Afrotherians	Echinops telfairi	XP_012862908.1	XP_004709540.1	XP_004697056.1	XP_004705394.1	XP_012859141.1	XP_004714402.1	XP_004700227.1	XP_004715900.1	XP_004713711.1	XP_004697187.1
Afrotherians	Elephantulus edwardii	XP_006893479.1	XP_006883267.1	XP_006888202.1	XP_006883552.1	XP_006879275.1	XP_006896494.1	XP_006898136.1	XP_006899799.1	XP_006901593.1	XP_008145916.2
Afrotherians	Loxodonta africana	XP_003419462.1	XP_003420193.2	XP_003404832.1	XP_003415301.1	XP_003408626.1	XP_010599358.1	XP_003411065.1	XP_010598680.1	XP_003419494.1	XP_028705752.1
Afrotherians	Orycteropus afer afer	XP_007943148.1	XP_007933508.1	XP_007941994.1	XP_007934074.1	XP_007942726.1	XP_007952685.1	XP_007947347.1	XP_007953726.1	XP_007943176.1	XP_007076865.1
Afrotherians	Trichechus manatus latirostris	XP_004383962.2	XP_004380747.1	XP_004384823.1	XP_004377309.1	XP_012411085.1	XP_004378683.1	XP_012410863.1	XP_012414466.1	XP_004383982.1	XP_006884487.1
Laurasiatherians	Acinonyx jubatus	XP_014923375.1	XP_014920334.1	XP_014943117.1	XP_014930621.1	XP_014941773.1	XP_014928271.1	XP_014920500.1	XP_014933740.1	XP_014935366.1	XP_014943215.1
Laurasiatherians	Ailuropoda melanoleuca	XP_011219956.1	XP_002913225.1	XP_002912969.1	XP_002913401.1	XP_011225245.1	XP_011233725.1	XP_011221878.1	XP_011231420.1	XP_011219967.1	XP_002916964.2
Laurasiatherians	Balaenoptera acutorostrata scammoni	XP_007171314.1	XP_007196081.1	XP_007172234.1	XP_007178729.1	XP_007180944.1	XP_007169191.1	XP_007182509.1	XP_007180088.1	XP_007174376.1	XP_007171420.1
Laurasiatherians	Bos mutus	XP_014333148.1	XP_005892666.1	XP_005890462.1	XP_005895937.1	XP_005910322.2	XP_014335598.1	XP_005910707.1	XP_005908336.1	XP_014333174.1	XP_005909196.2
Laurasiatherians	Bos taurus	XP_015316782.1	NP_001179406.1	NP_001192961.1	XP_015316261.1	XP_010815604.2	XP_015327549.1	XP_015330556.1	XP_010813224.1	XP_015316802.1	XP_010814999.2
Laurasiatherians	Camelus bactrianus	XP_010955152.1	XP_010963536.1	XP_010969943.1	XP_010946327.1	XP_010967163.1	XP_010965241.1	XP_010972362.1	XP_010961782.1	XP_010955471.1	XP_010970616.1
Laurasiatherians	Camelus dromedarius	XP_010994340.1	XP_010993234.1	XP_010979961.1	XP_010992028.1	XP_010986744.1	XP_010981662.1	XP_010991471.1	XP_010987660.1	XP_010993072.1	XP_031293654.1
Laurasiatherians	Camelus ferus	XP_006179635.1	XP_006178949.1	XP_006179420.1	XP_006189555.1	XP_006184286.1	XP_006177658.1	XP_014413088.1	XP_014411132.1	XP_006179171.1	XP_032320994.1
Laurasiatherians	Canis lupus familiaris	XP_013976675.1	XP_005638410.1	XP_005626609.1	XP_544484.3	XP_005623209.1	XP_533941.4	XP_005622656.1	XP_013976146.1	XP_005631600.1	XP_038519288.1
Laurasiatherians	Capra hircus	XP_005700059.1	XP_005695364.1	XP_013820916.1	XP_013829583.1	XP_013828585.1	XP_013820704.1	XP_005690662.1	XP_013826742.1	XP_005700029.1	XP_013828155.2
Laurasiatherians	Ceratotherium simum simum	XP_014648643.1	XP_014636145.1	XP_004420239.1	XP_004425827.1	XP_014645982.1	XP_014651553.1	XP_014650134.1	XP_014651567.1	XP_004437873.2	XP_014641709.1
Laurasiatherians	Condylura cristata	XP_004683397.1	XP_012583994.1	XP_012583453.1	XP_004678705.1	XP_004682098.1	XP_004688925.1	XP_012586329.1	XP_012585946.1	XP_012580765.1	XP_004679604.1
Laurasiatherians	Eptesicus fuscus	XP_008145260.1	XP_008141288.1	XP_008140364.1	XP_008146437.1	XP_008146676.1	XP_008149005.1	XP_008148129.1	XP_008138266.1	XP_008157345.1	XP_014706343.1
Laurasiatherians	Equus asinus	XP_014700476.1	XP_014702589.1	XP_014683936.1	XP_014710482.1	XP_014687615.1	XP_014698620.1	XP_014686260.1	XP_014704194.1	XP_014700471.1	XP_005599286.2
Laurasiatherians	Equus caballus	XP_014585032.1	XP_001918252.1	XP_001502783.3	XP_005607375.1	XP_014591326.1	XP_005611539.1	XP_005608051.1	XP_014587143.1	XP_005598335.1	XP_023115378.1
Laurasiatherians	Felis catus	XP_006937604.1	XP_003987271.2	XP_003980826.2	XP_003989733.1	XP_006933120.2	XP_011285979.1	XP_011278273.1	XP_006941366.1	XP_003993669.1	XP_010620617.1
Laurasiatherians	Leptonychotes weddellii	XP_006740262.1	XP_006727539.1	XP_006731073.1	XP_006748376.1	XP_006739258.1	XP_006748907.1	XP_006746323.1	XP_006750496.1	XP_006746320.1	XP_003404933.1
Laurasiatherians	Miniopterus natalensis	XP_016063759.1	XP_016067031.1	XP_016053020.1	XP_016074594.1	XP_016061166.1	XP_016053380.1	XP_016056888.1	XP_016061992.1	XP_016075727.1	XP_006765519.2
Laurasiatherians	Mustela putorius furo	XP_004770036.1	XP_012910945.1	XP_004744991.1	XP_004741167.1	XP_012913047.1	XP_004771585.1	XP_004756859.1	XP_012903171.1	XP_004770220.1	XP_008849041.1
Laurasiatherians	Myotis brandtii	XP_014393701.1	XP_005877602.1	XP_014394635.1	XP_005875320.1	XP_005871281.1	XP_014387353.1	XP_014383735.1	XP_014400181.1	XP_005864255.1	XP_003273288.2
Laurasiatherians	Myotis davidii	XP_015424453.1	XP_015413092.1	XP_015418880.1	XP_006777708.1	XP_015426765.1	XP_015419787.1	XP_006753195.2	XP_015425554.1	XP_015424559.1	XP_012783122.1
Laurasiatherians	Myotis lucifugus	XP_006101707.1	XP_014315014.1	XP_014309382.1	XP_014322827.1	XP_014301022.1	XP_014321932.1	XP_014304510.1	XP_014318079.1	XP_014304008.1	XP_004644904.1
Laurasiatherians	Odobenus rosmarus divergens	XP_012423891.1	XP_004411478.1	XP_004405521.1	XP_004394766.1	XP_004394534.1	XP_012416067.1	XP_004400536.1	XP_004396553.1	XP_004394121.1	XP_003814038.1
Laurasiatherians	Orcinus orca	XP_012392620.1	XP_004273971.1	XP_004282157.1	XP_004266697.1	XP_004262531.2	XP_004277701.1	XP_004284572.1	XP_012393827.1	XP_004264497.1	XP_518100.3
Laurasiatherians	Panthera tigris altaica	XP_015397484.1	XP_007081805.1	XP_007087788.1	XP_007078217.1	XP_007095021.2	XP_007075257.1	XP_007077025.1	XP_015399559.1	XP_007091971.1	XP_003776764.1
Laurasiatherians	Physeter catodon	XP_007128306.1	XP_007114272.1	XP_007115120.1	XP_007111395.1	XP_007122840.1	XP_007109445.1	XP_007122207.1	XP_007129971.1	XP_007102676.1	NP_001178020.1
Laurasiatherians	Pteropus vampyrus	XP_011367283.1	XP_011353319.1	XP_011360644.1	XP_011356346.1	XP_011371483.1	XP_011371924.1	XP_011368390.1	XP_011370643.1	XP_011367043.1	XP_003759043.1
Laurasiatherians	Rousettus aegyptiacus	XP_015974810.1	XP_016000491.1	XP_015993173.1	XP_015987415.1	XP_016000919.1	XP_016000472.1	XP_016006750.1	XP_016020770.1	XP_015974082.1	XP_006158970.1
Laurasiatherians	Sorex araneus	XP_003774134.1	XP_004609848.1	XP_012788479.1	XP_004603766.1	XP_012788589.1	XP_004619544.1	XP_012787486.1	XP_004601109.2	XP_004618566.1	XP_031545220.1
Laurasiatherians	Ursus maritimus	XP_008707378.1	XP_008700379.1	XP_008689814.1	XP_008693077.1	XP_008696802.1	XP_008709495.1	XP_008693202.1	XP_008686962.1	XP_008707337.1	XP_005350424.1
Laurasiatherians	Vicugna pacos	XP_006210805.1	XP_006201781.1	XP_006212856.1	XP_006196872.1	XP_006208305.1	XP_006206602.1	XP_015090281.1	XP_015104008.1	XP_006216795.1	NP_081307.2
Marsupials	Sarcophilus harrisii	XP_003774134.1	XP_003756106.1	XP_012396321.1	XP_012400979.1	XP_012402514.1	XP_012397488.1	XP_012405537.1	XP_012402209.1	XP_012408298.1	XP_008690927.1
Marsupials	Monodelphis domestica	XP_007502734.1	XP_007472508.1	XP_007473686.1	XP_007491410.1	XP_016283988.1	XP_016277699.1	XP_007489017.1	XP_016285698.1	NA	XP_003339588.1
Marsupials	Phascolarctos cinereus	XP_020823954.1	XP_020864897.1	XP_020846895.1	XP_020838636.1	XP_020859973.1	XP_020834304.1	XP_020826892.1	XP_020837756.1	NA	XP_020848081.1
Primates	Aotus nancymaae	XP_012318316.1	XP_012297575.1	XP_012293527.1	XP_012295632.1	XP_012308598.1	XP_012291176.1	XP_012299183.1	XP_012294125.1	XP_012318507.1	XP_012316561.1
Primates	Callithrix jacchus	XP_009006752.1	XP_002753430.1	XP_003732249.2	XP_002750529.1	XP_003734112.2	XP_008985325.1	XP_008983953.1	XP_008986241.1	XP_009006651.1	XP_008989094.1
Primates	Cebus capucinus imitator	XP_017392403.1	XP_017401505.1	XP_017387837.1	XP_017390136.1	XP_017402419.1	XP_017383692.1	XP_017387452.1	XP_017362088.1	XP_017392750.1	XP_017403205.1
Primates	Cercocebus atys	XP_011897003.1	XP_011890407.1	XP_011945699.1	XP_011935444.1	XP_011939092.1	XP_011928705.1	XP_011891724.1	XP_011934277.1	XP_011897277.1	XP_011906621.1
Primates	Colobus angolensis palliatus	XP_011797843.1	XP_011796598.1	XP_011790747.1	XP_011810989.1	XP_011804798.1	XP_011799011.1	XP_011811107.1	XP_011807905.1	XP_011797974.1	XP_011803183.1
Primates	Homo sapiens	NP_444282.3	NP_001269239.1	NP_821138.1	NP_937770.1	NP_079040.2	XP_011526187.1	XP_011542440.1	NP_067008.3	NP_001034585.1	XP_021587981.1
Primates	Macaca mulatta	XP_014969145.1	XP_014997563.1	XP_014996434.1	XP_001108634.1	XP_002808514.2	XP_014978065.1	XP_014983149.1	XP_014979331.1	NP_001181594.1	XP_011843114.1
Primates	Mandrillus leucophaeus	XP_011820626.1	XP_011849380.1	XP_011824589.1	XP_011837025.1	XP_011847168.1	XP_011822867.1	XP_011836563.1	XP_011828717.1	XP_011848880.1	XP_015348106.1
Primates	Microcebus murinus	XP_012633625.1	XP_012622105.1	XP_012617657.1	XP_012605994.1	XP_012629380.1	XP_012617086.1	XP_012606752.1	XP_012630199.1	XP_012633397.1	XP_004737659.1
Primates	Nomascus leucogenys	XP_003274269.1	XP_003266867.1	XP_003266450.1	XP_003271694.1	XP_012353671.1	XP_012358810.1	XP_003267437.2	XP_004089679.1	XP_003274205.1	XP_033287969.1
Primates	Otolemur garnettii	XP_003798824.1	XP_012661842.1	XP_003782369.1	XP_003799898.1	XP_008270342.1	XP_012663794.1	XP_012666198.1	XP_012664650.1	XP_012666117.1	XP_003900569.3
Primates	Pan paniscus	XP_003828705.1	XP_008966078.1	XP_003829312.1	XP_003809499.1	XP_003832818.1	XP_008970960.1	XP_003808040.1	XP_008962929.1	XP_003828616.1	XP_006978938.1
Primates	Pan troglodytes	XP_003313190.1	XP_016783598.1	XP_527015.2	XP_001139244.1	XP_009426568.1	XP_009432751.1	XP_009440065.1	XP_512635.4	XP_009421637.1	XP_007127600.3
Primates	Papio anubis	XP_003909583.1	NP_001162547.1	XP_003900163.1	XP_009200572.1	XP_003902217.2	XP_003914779.2	XP_009194395.1	XP_003915518.1	XP_003909658.1	XP_012505145.1
Primates	Pongo abelii	XP_009244396.1	XP_009248053.1	XP_002815944.1	XP_002811283.1	XP_009247685.1	XP_009250919.1	XP_009245005.1	XP_009230841.1	XP_009244467.1	XP_010371619.2
Primates	Propithecus coquereli	XP_012520185.1	XP_012504593.1	XP_012506756.1	XP_012501366.1	XP_012512182.1	XP_012501580.1	XP_012499791.1	XP_012512434.1	XP_012520818.1	XP_036080084.1
Primates	Rhinopithecus roxellana	XP_010364738.1	XP_010375137.1	XP_010358324.1	XP_010353978.1	XP_010356898.1	XP_010365631.1	XP_010351579.1	XP_010384038.1	XP_010375440.1	XP_004371251.1
Rabbit	Ochotona princeps	XP_004596899.1	XP_012783433.1	XP_004586684.1	XP_004592423.1	XP_012782163.1	XP_004595940.1	XP_012785009.1	XP_012785256.1	XP_004596925.1	XP_007937971.1
Rodents	Chinchilla lanigera	XP_005384491.1	XP_013365420.1	XP_005376527.1	XP_005390770.2	XP_013372597.1	XP_005406203.2	XP_013375818.1	XP_013377918.1	XP_013369688.1	XP_005376394.1
Rodents	Dipodomys ordii	XP_012876349.1	XP_012865749.1	XP_012871450.1	XP_012887767.1	XP_012868783.1	XP_012878114.1	XP_012872713.1	XP_012881647.1	XP_012876361.1	XP_012884064.1
Rodents	Fukomys damarensis	XP_010634220.1	XP_010636939.1	XP_010612384.1	XP_010629364.1	XP_010614613.1	XP_010633098.1	XP_010640918.1	XP_010631117.1	XP_010634384.1	XP_008577955.1
Rodents	Heterocephalus glaber	XP_012930186.1	XP_004835478.1	XP_004836275.1	XP_004869075.1	XP_004837538.1	XP_004866126.1	XP_012930775.1	XP_012932833.1	XP_012930277.1	NP_001164654.1
Rodents	Ictidomys tridecemlineatus	XP_005333616.1	XP_005316972.1	XP_005333279.1	XP_005317693.1	XP_005321408.1	XP_013216855.1	XP_005326650.1	XP_005340571.1	XP_005333630.1	XP_004665020.1
Rodents	Jaculus jaculus	XP_012803780.1	XP_012804719.1	XP_012805713.1	XP_004657367.1	XP_012805431.1	XP_012803445.1	XP_004653490.1	XP_012804500.1	XP_004656511.2	XP_006751509.2
Rodents	Marmota marmota marmota	XP_015358529.1	XP_015335591.1	XP_015343938.1	XP_015340261.1	XP_015343937.1	XP_015359323.1	XP_015338792.1	XP_015352385.1	XP_015362516.1	XP_012620947.1
Rodents	Mesocricetus auratus	XP_012966511.1	XP_012967827.1	XP_005078517.1	XP_005079712.1	XP_012967579.1	XP_012976862.1	XP_012974608.1	XP_012980785.1	XP_005063972.1	XP_016066719.1
Rodents	Microtus ochrogaster	XP_013203240.1	XP_013208152.1	XP_005355312.1	XP_005353447.1	XP_013205039.1	XP_005371195.2	XP_013202422.1	XP_005361350.1	XP_005351893.1	XP_014405816.1
Rodents	Mus musculus	NP_647462.1	NP_694715.2	NP_001239416.1	NP_808534.1	NP_766611.2	XP_006523485.1	XP_006497146.1	NP_083990.2	NP_001034583.1	XP_023601233.1
Rodents	Nannospalax galili	XP_008820503.1	XP_008847324.1	XP_008846182.1	XP_008835029.1	XP_008819975.1	XP_008835463.1	XP_008847409.1	XP_008852131.1	XP_008837162.1	XP_004392057.2
Rodents	Octodon degus	XP_012369242.1	XP_012371876.1	XP_012370434.1	XP_004639593.1	XP_012371012.1	XP_004633022.1	XP_012369177.1	XP_004636920.1	XP_004643873.1	XP_003782286.1
Rodents	Peromyscus maniculatus bairdii	XP_015854566.1	XP_015843069.1	XP_006976830.1	XP_015849907.1	XP_015865491.1	XP_015856278.1	XP_015848507.1	XP_015856038.1	XP_006980779.1	XP_023392928.1
Rodents	Rattus norvegicus	XP_008758420.1	NP_001012220.1	XP_006253634.1	XP_342942.5	XP_008763135.1	XP_006244401.1	XP_008768035.1	XP_008757346.1	XP_008758427.1	XP_004611623.1
Tree shrews	Galeopterus variegatus	XP_008588471.1	XP_008580757.1	XP_008582493.1	XP_008564214.1	XP_008586445.1	XP_008571282.1	XP_008576645.1	XP_008591994.1	XP_008565675.1	XP_004836437.1
Tree shrews	Tupaia chinensis	XP_006150013.1	XP_006162932.1	XP_006166906.1	XP_006159497.1	XP_006155863.1	XP_014444938.1	XP_006157295.1	XP_006161813.2	XP_006149902.1	XP_012981391.1
*NA, Non-applied in this study
