# Supplementary material for: Molecular Evolution of CatSper in Mammals and Function of Sperm Hyperactivation in Gray Short-Tailed Opossum
Source: Cells. 2021 Apr 29;10(5):1047. doi: 10.3390/cells10051047 (PMC8147001; doi:10.3390/cells10051047)
Supplement: Supplementary file 1 [file cells-10-01047-s001.zip › Hwang_et_al_2021_Evo_Table_S2.xlsx]

## Sheet: Sheet1
	Table S1. Primer pairs for qRT-PCR used in this study
	Gene	Accession no.	5' > 3'
	CatSper1	XM_007502672	Fwd	AAATTGTCCTCCGCAACAAG
			Rev	GTGCGTCAGAGACTCATCCA
	CatSper2	XM_007472446	Fwd	GAATCTACCTCCAAAAACCTCA
			Rev	GCCAAACCACCTCCTCAC
	CatSper3	XM_007473624	Fwd	TGCCACCCTTTCCTTCATC
			Rev	GGTTTCTTCATTGGTTTGTCC
	CatSper4	XM_007491348	Fwd	ACCTGTTGGTGGTTGTCGTG
			Rev	GCTCTGGTTTCTCCGTGCT
	CatSperb	XM_016428503	Fwd	AGGAAGCTGGAAAGTCAAACA
			Rev	TGGGGTTATACACAGGACGA
	CatSperg	XM_016422213	Fwd	ACTCCACGTTCATGGTCTCC
			Rev	CAGCATTTCTTCAAGGGTGT
	CatSperd	XM_007488955	Fwd	AGGCTCAGAATTGGACCTCA
			Rev	TCAAGGTCAGGCCATAACAA
	CatSpere	XM_016430212	Fwd	TGCGATTGAGACATTTGGAG
			Rev	CAGGCAAGCAAAGAACACAA
	EFCAB9	XM_003339540	Fwd	GATGCCACAGGAGAGATTGG
			Rev	TGTCCATCAGCTCAAACACAG
	TBP	XM_007484944	Fwd	GGGGAGCTGTGATGTGAAGT
			Rev	GCAGAACAATTCTGGGTTTGA
